# Supplementary material for: Ergosterol and β-sitosterol exert cholesterol-lowering effects by enhancing gut microbiota-mediated cholesterol sulfonation and total bile acid excretion in mice
Source: Royal Society of Chemistry journal article supplement (doi:10.1039/d5fo03052h), 2026-01-01

### Fig.3 Original Blot Images

1.Original western blot of ACAT2 for three repeats.

The samples came from the same experiment, and the gels/blots were processed in parallel.

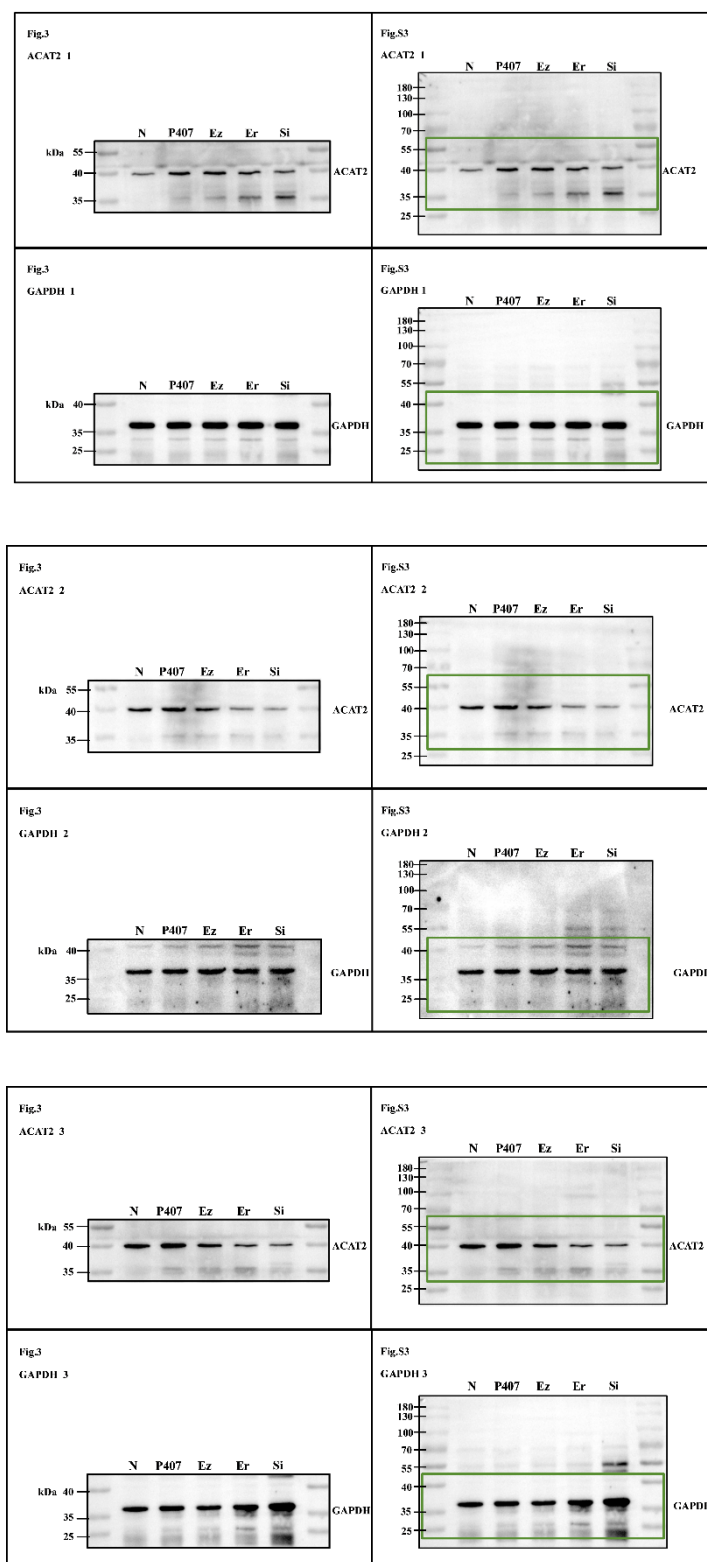

2.Original western blot of LXR for three repeats.

The samples came from the same experiment, and the gels/blots were processed in parallel.

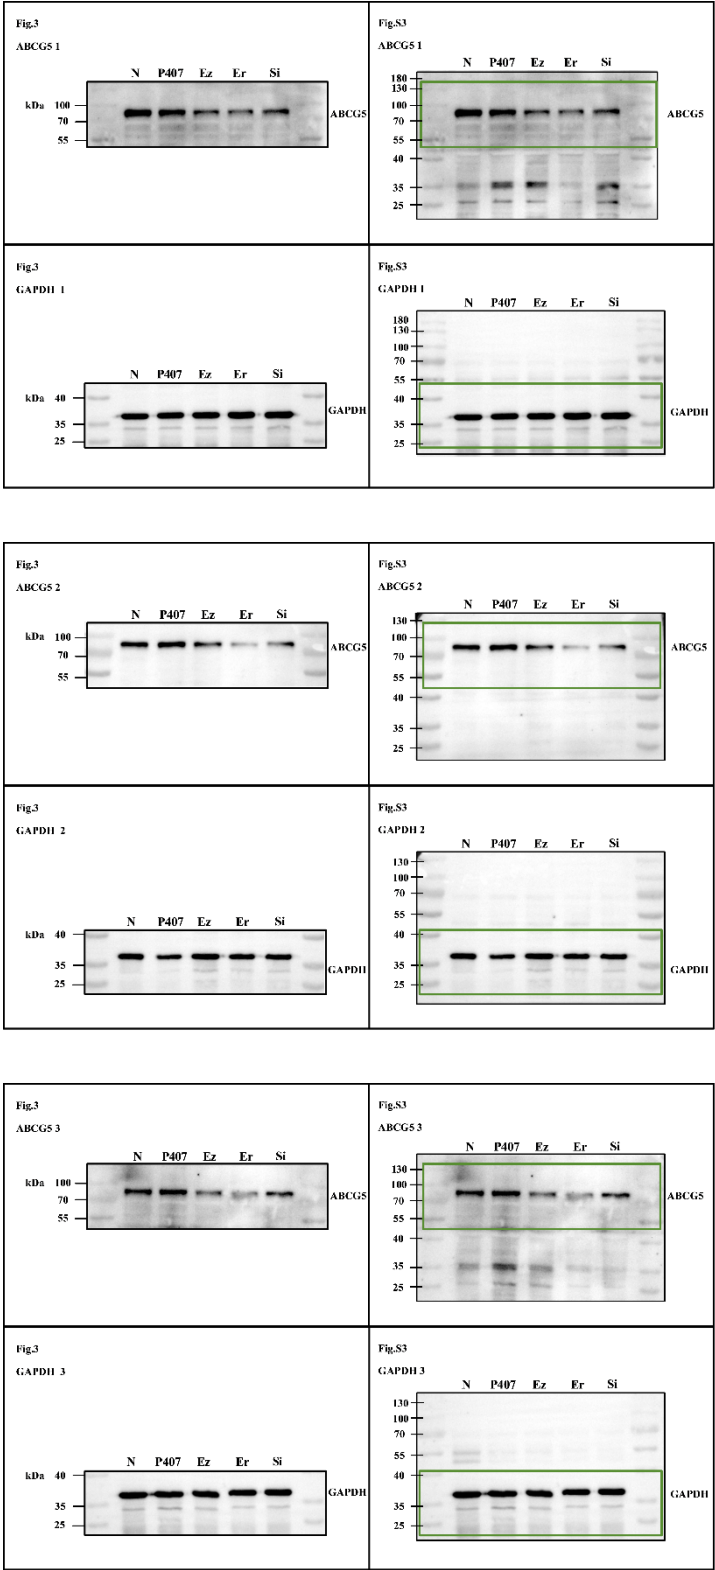

3.Original western blot of ABCG5 for three repeats.

The samples came from the same experiment, and the gels/blots were processed in parallel.

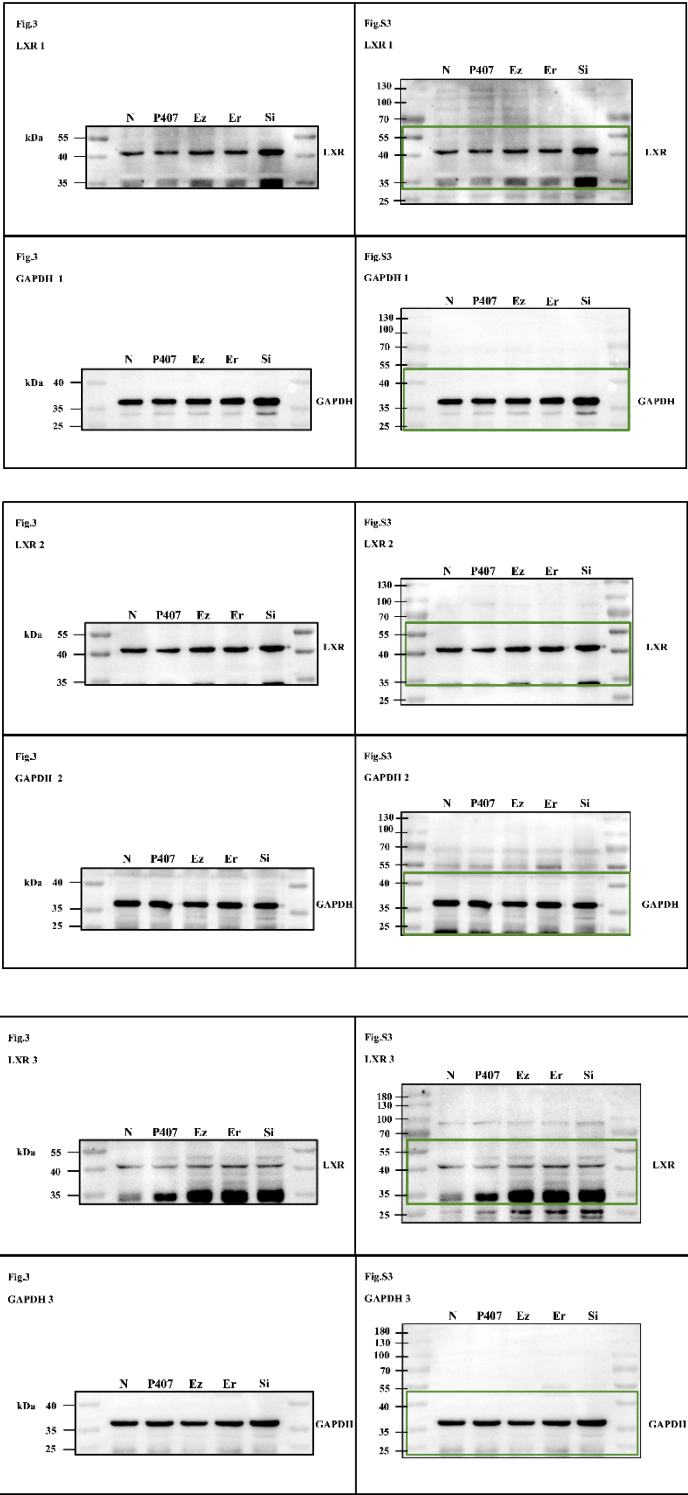

Supplement: d5fo03052h1.pdf [file d5fo03052h1.pdf]
