# Supplementary material for: Ergosterol and β-sitosterol exert cholesterol-lowering effects by enhancing gut microbiota-mediated cholesterol sulfonation and total bile acid excretion in mice
Source: Royal Society of Chemistry journal article supplement (doi:10.1039/d5fo03052h), 2026-01-01

## Fig.4 Original Blot Images

1.Original western blot of Small intestine FXR for three repeats.

The samples came from the same experiment, and the gels/blots were processed in parallel.

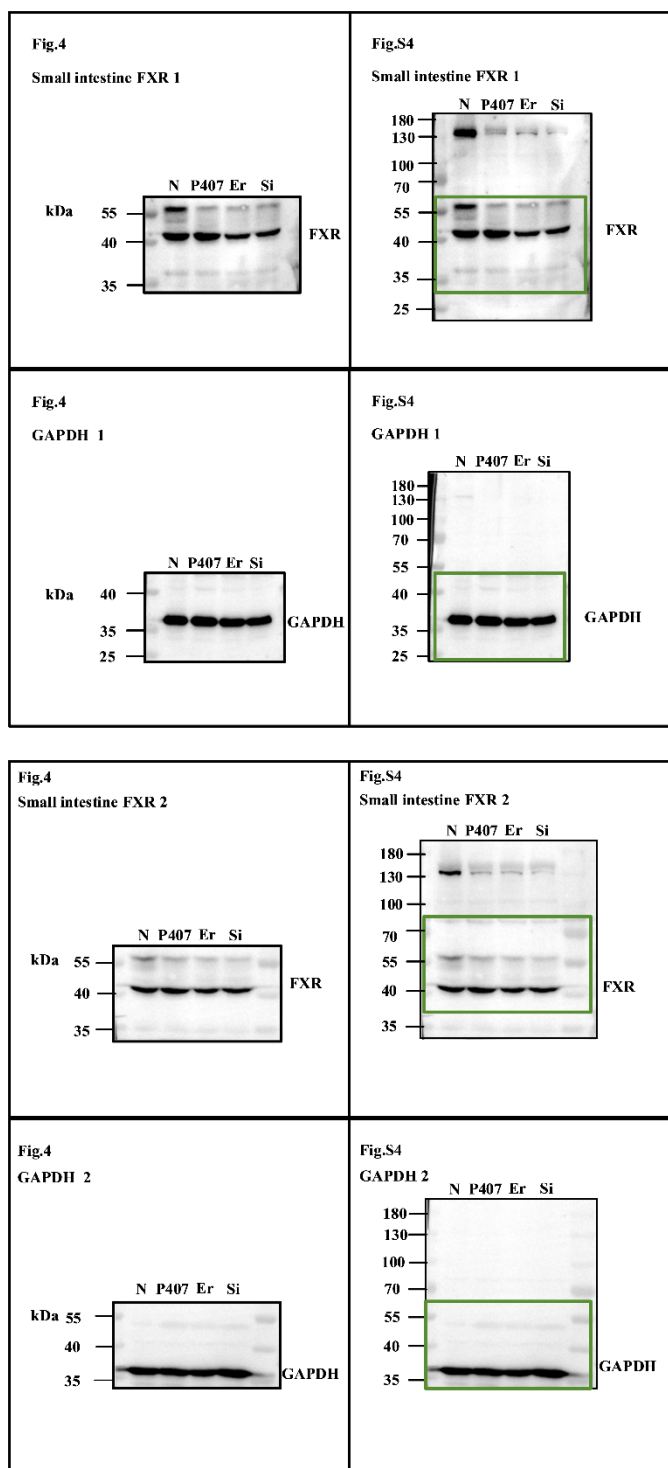

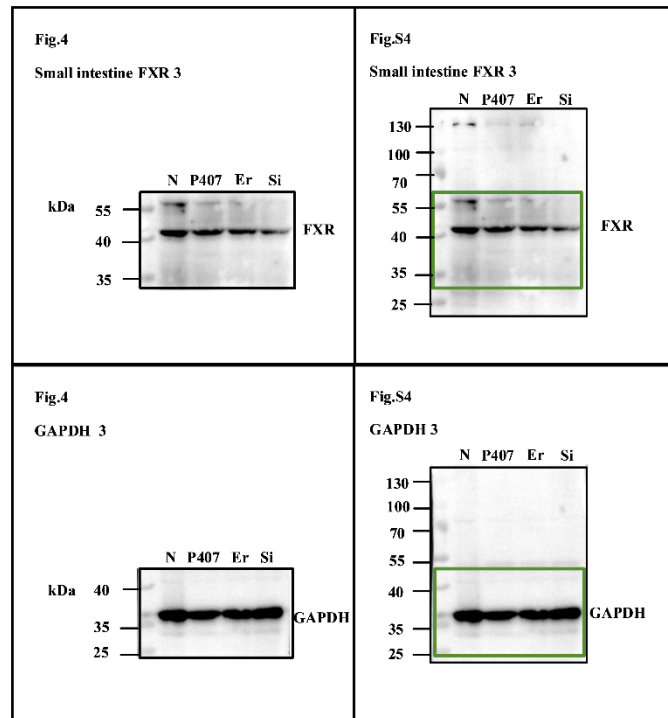

2.Original western blot of Small intestine ASBT for three repeats.

The samples came from the same experiment, and the gels/blots were processed in parallel.

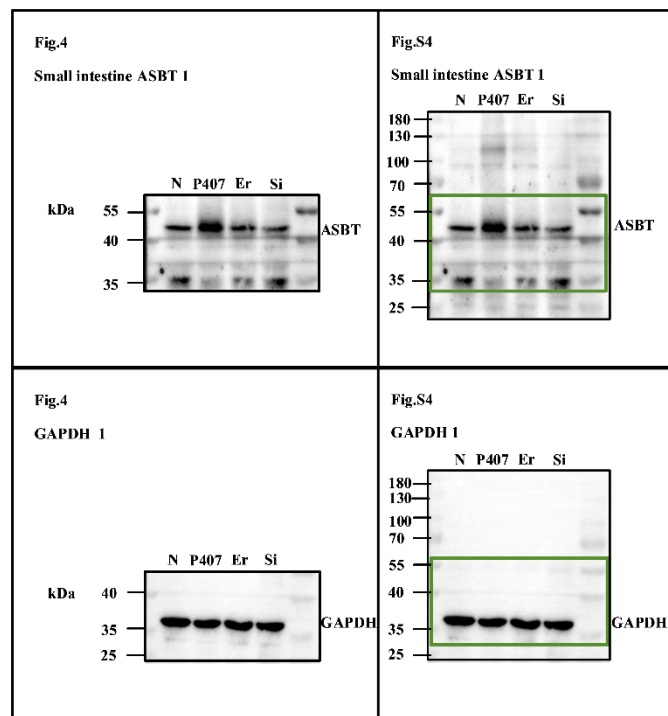

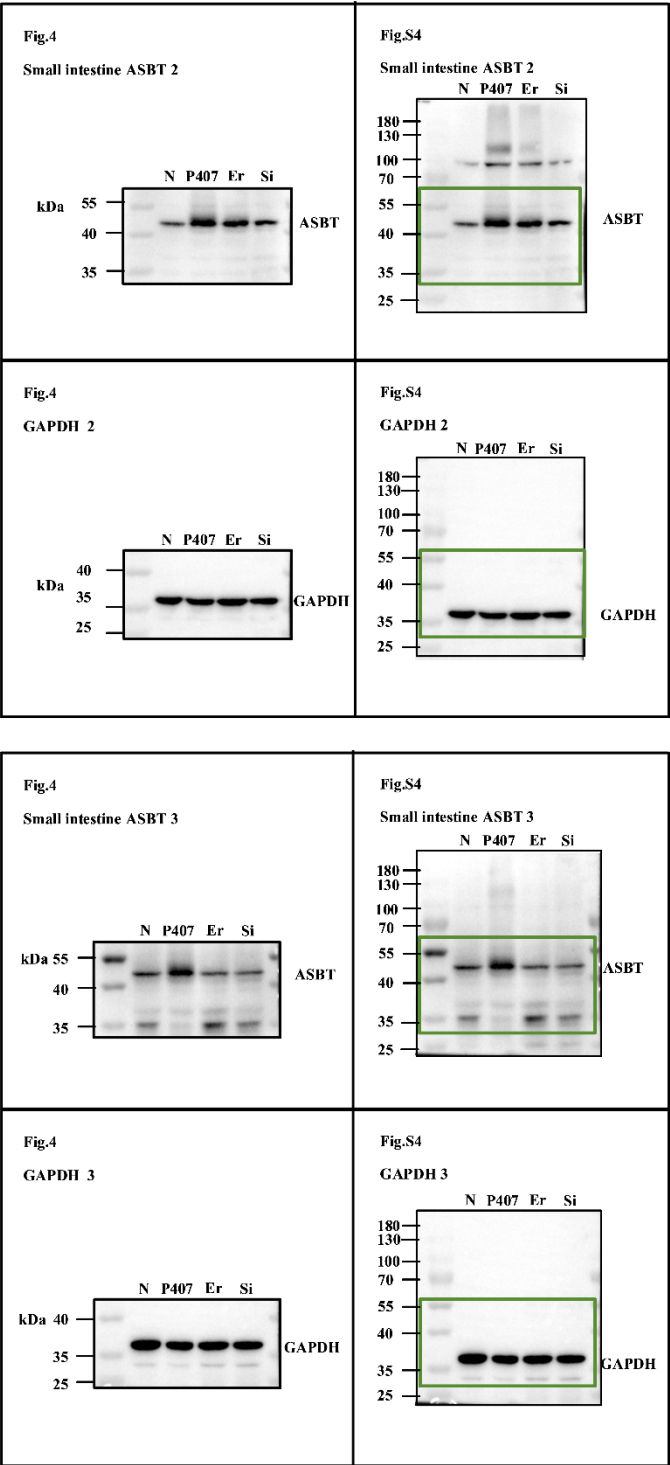

3.Original western blot of Liver FXR for three repeats.

The samples came from the same experiment, and the gels/blots were processed in parallel.

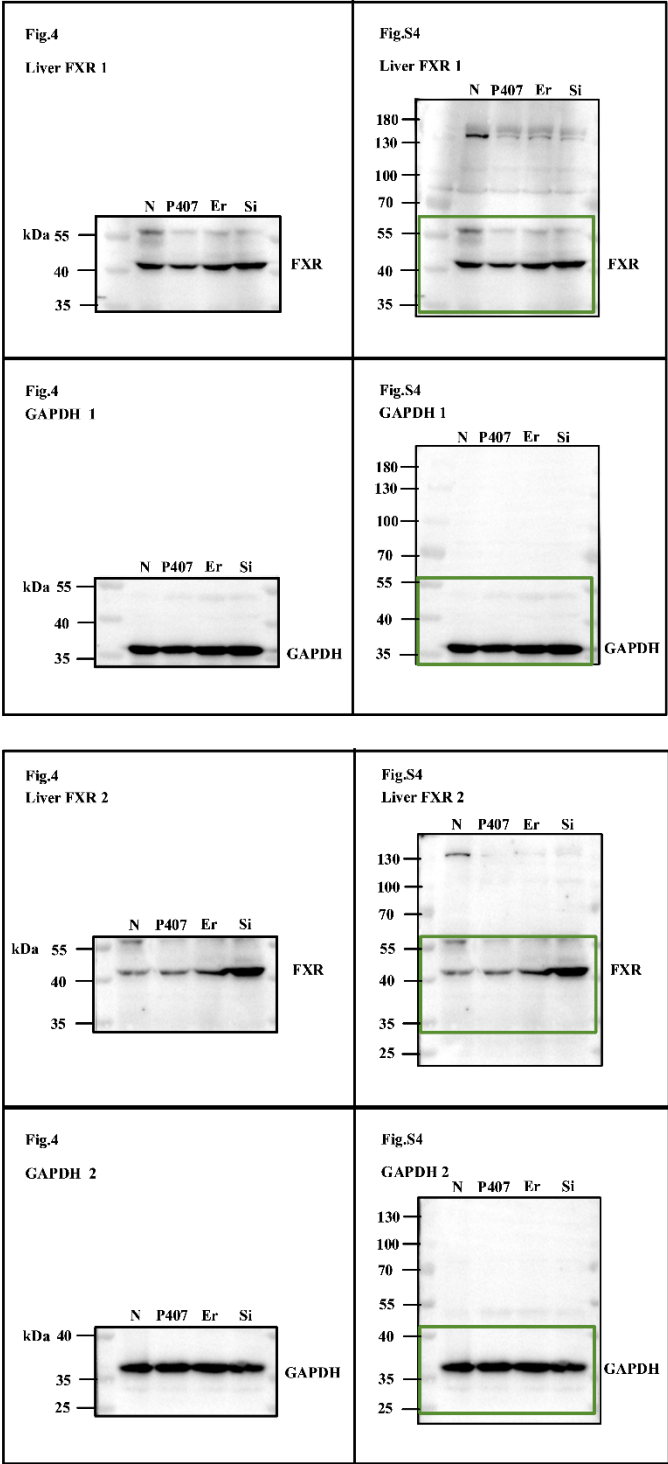

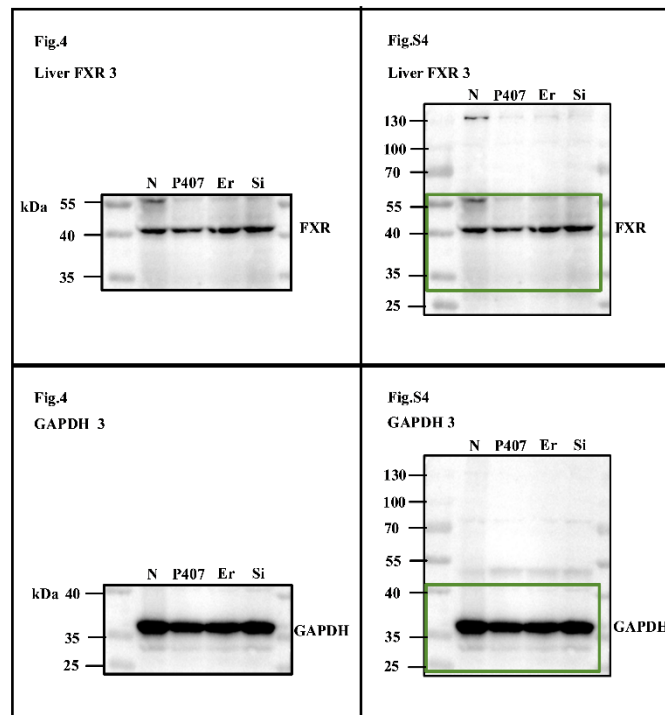

4.Original western blot of Liver NTCP for three repeats.

The samples came from the same experiment, and the gels/blots were processed in parallel.

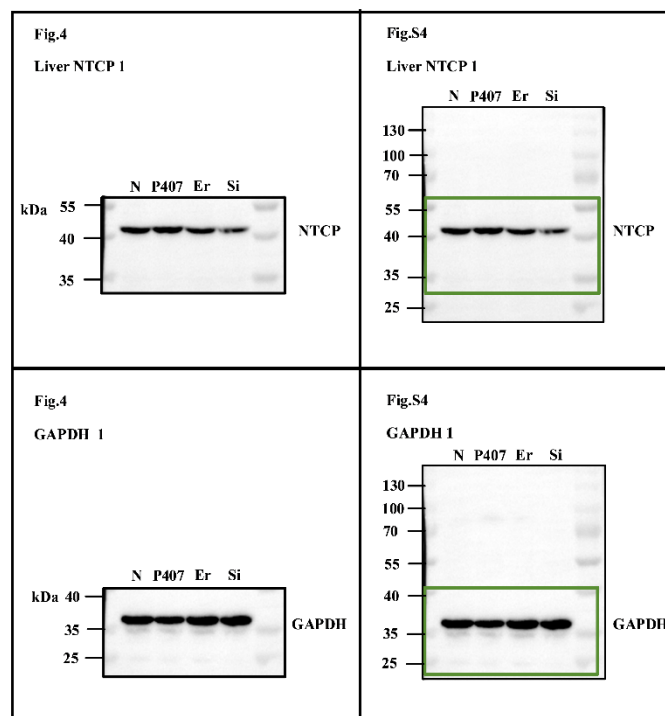

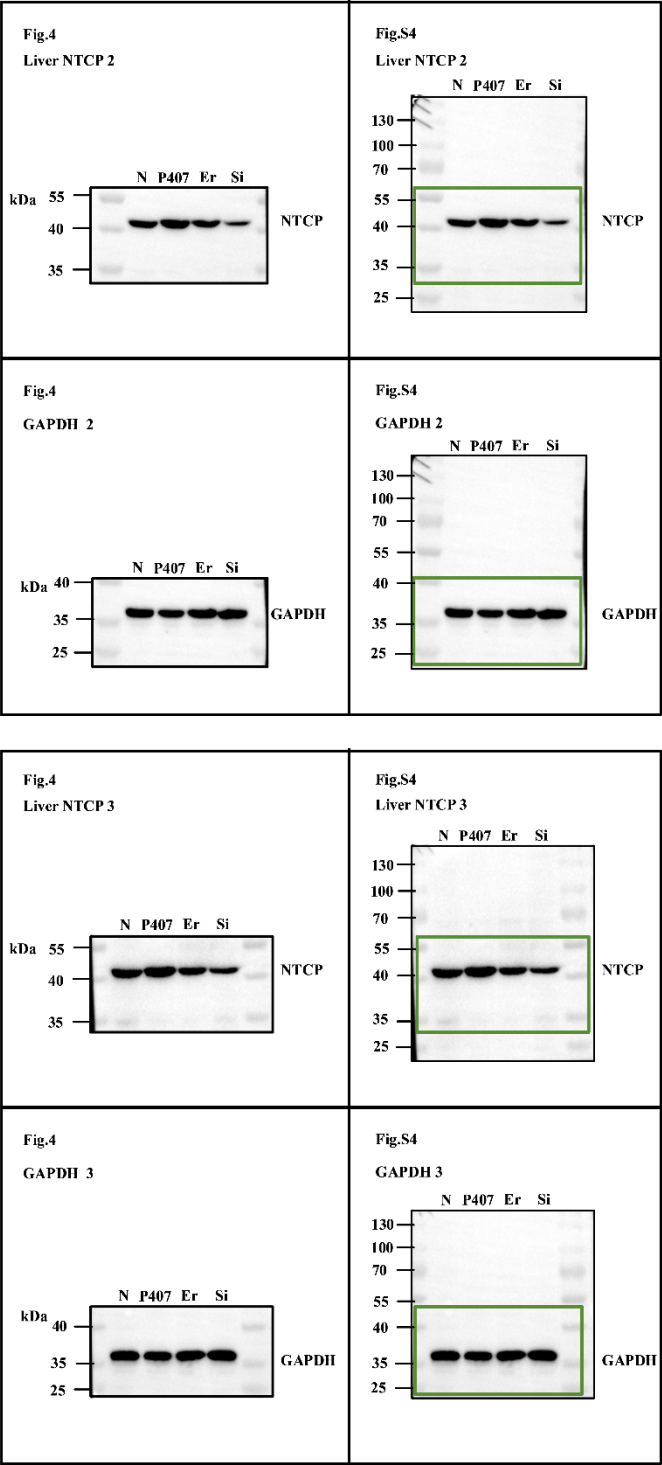

Supplement: d5fo03052h2.pdf [file d5fo03052h2.pdf]
